# Supplementary material
Source: PubMed Central journal article supplement (PMC7964292)
Supplement: 14-00623.pdf [file 14-00623.pdf]

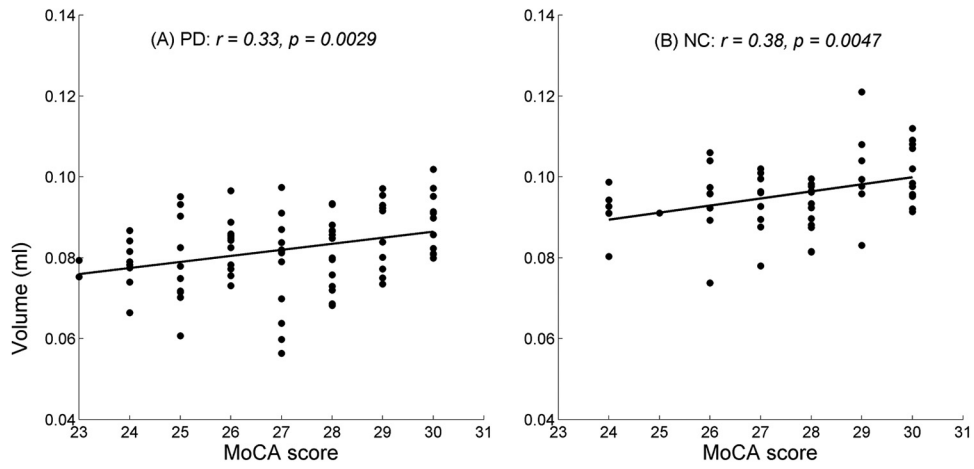

**ON-LINE FIG 1.** The correlation between caudate volume (adjusted for age, sex, education duration, and total intracranial volume) and MoCA score. A, Patients with PD. B, Healthy controls (NC). Each dot denotes an individual subject.

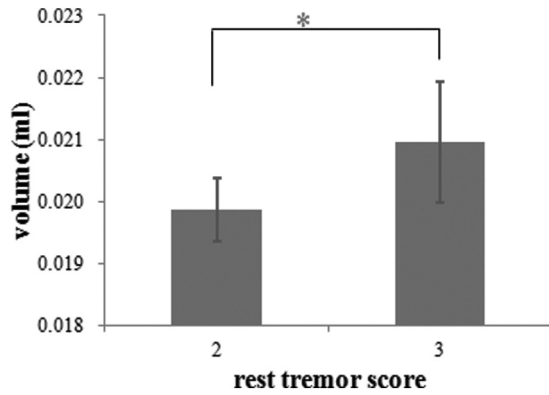

**ON-LINE FIG 2.** The relationship between the thalamic volume and rest tremor scores of 23 tremor-dominant patients with PD with scores arranged between 2 and 3. The asterisk denotes a significant difference with  $P < .05$ .
